# Supplementary material for: Neuroprotective protein ADNP-dependent histone remodeling complex promotes T helper 2 immune cell differentiation
Source: PubMed Central journal article supplement (PMC10501989; doi:10.1016/j.immuni.2023.05.010), 2023-07-11
Supplement: mmc1.pdf [file mmc1.pdf]

**Immunity, Volume 56**

**Supplemental information**

**Neuroprotective protein ADNP-dependent**

**histone remodeling complex promotes**

**T helper 2 immune cell differentiation**

**Ana C.F. Ferreira, Aydan C.H. Szeto, Paula A. Clark, Alastair Crisp, Patrycja Kozik, Helen E. Jolin, and Andrew N.J. McKenzie**

**Figure S1**

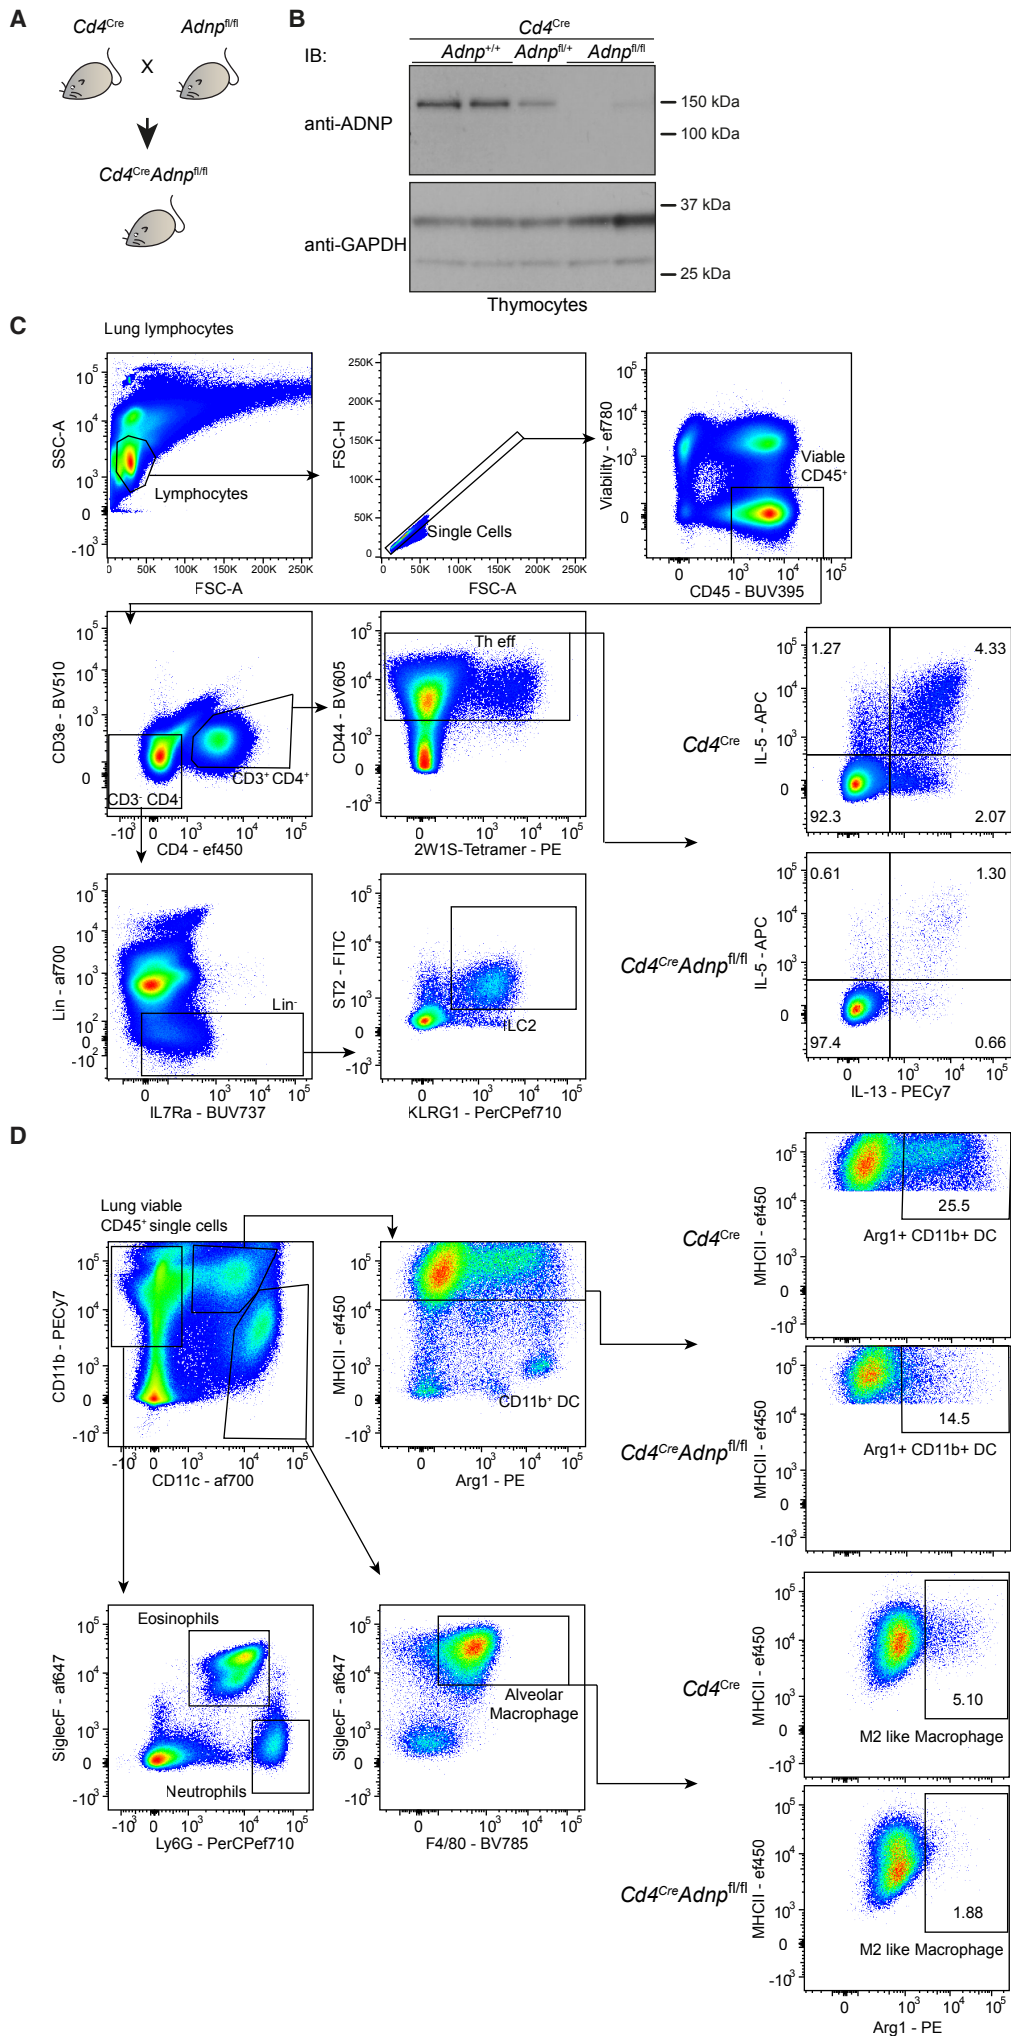

**Figure S1. Generation of  $Cd4^{Cre}Adnp^{fl/fl}$  mice and gating strategy for lymphocyte and myeloid cell population analysis, related to Figure 2.**

(A) Schematic of the generation of conditional ADNP-deficient mice.

(B) Detection of ADNP (150 kDa) and GAPDH (35 kDa) proteins in purified thymocytes from the indicated mice. IB refers to immunoblotting antibody.

(C) Gating strategy for cytokine expressing lymphocytes.

(D) Gating strategy for myeloid populations.

**Figure S2**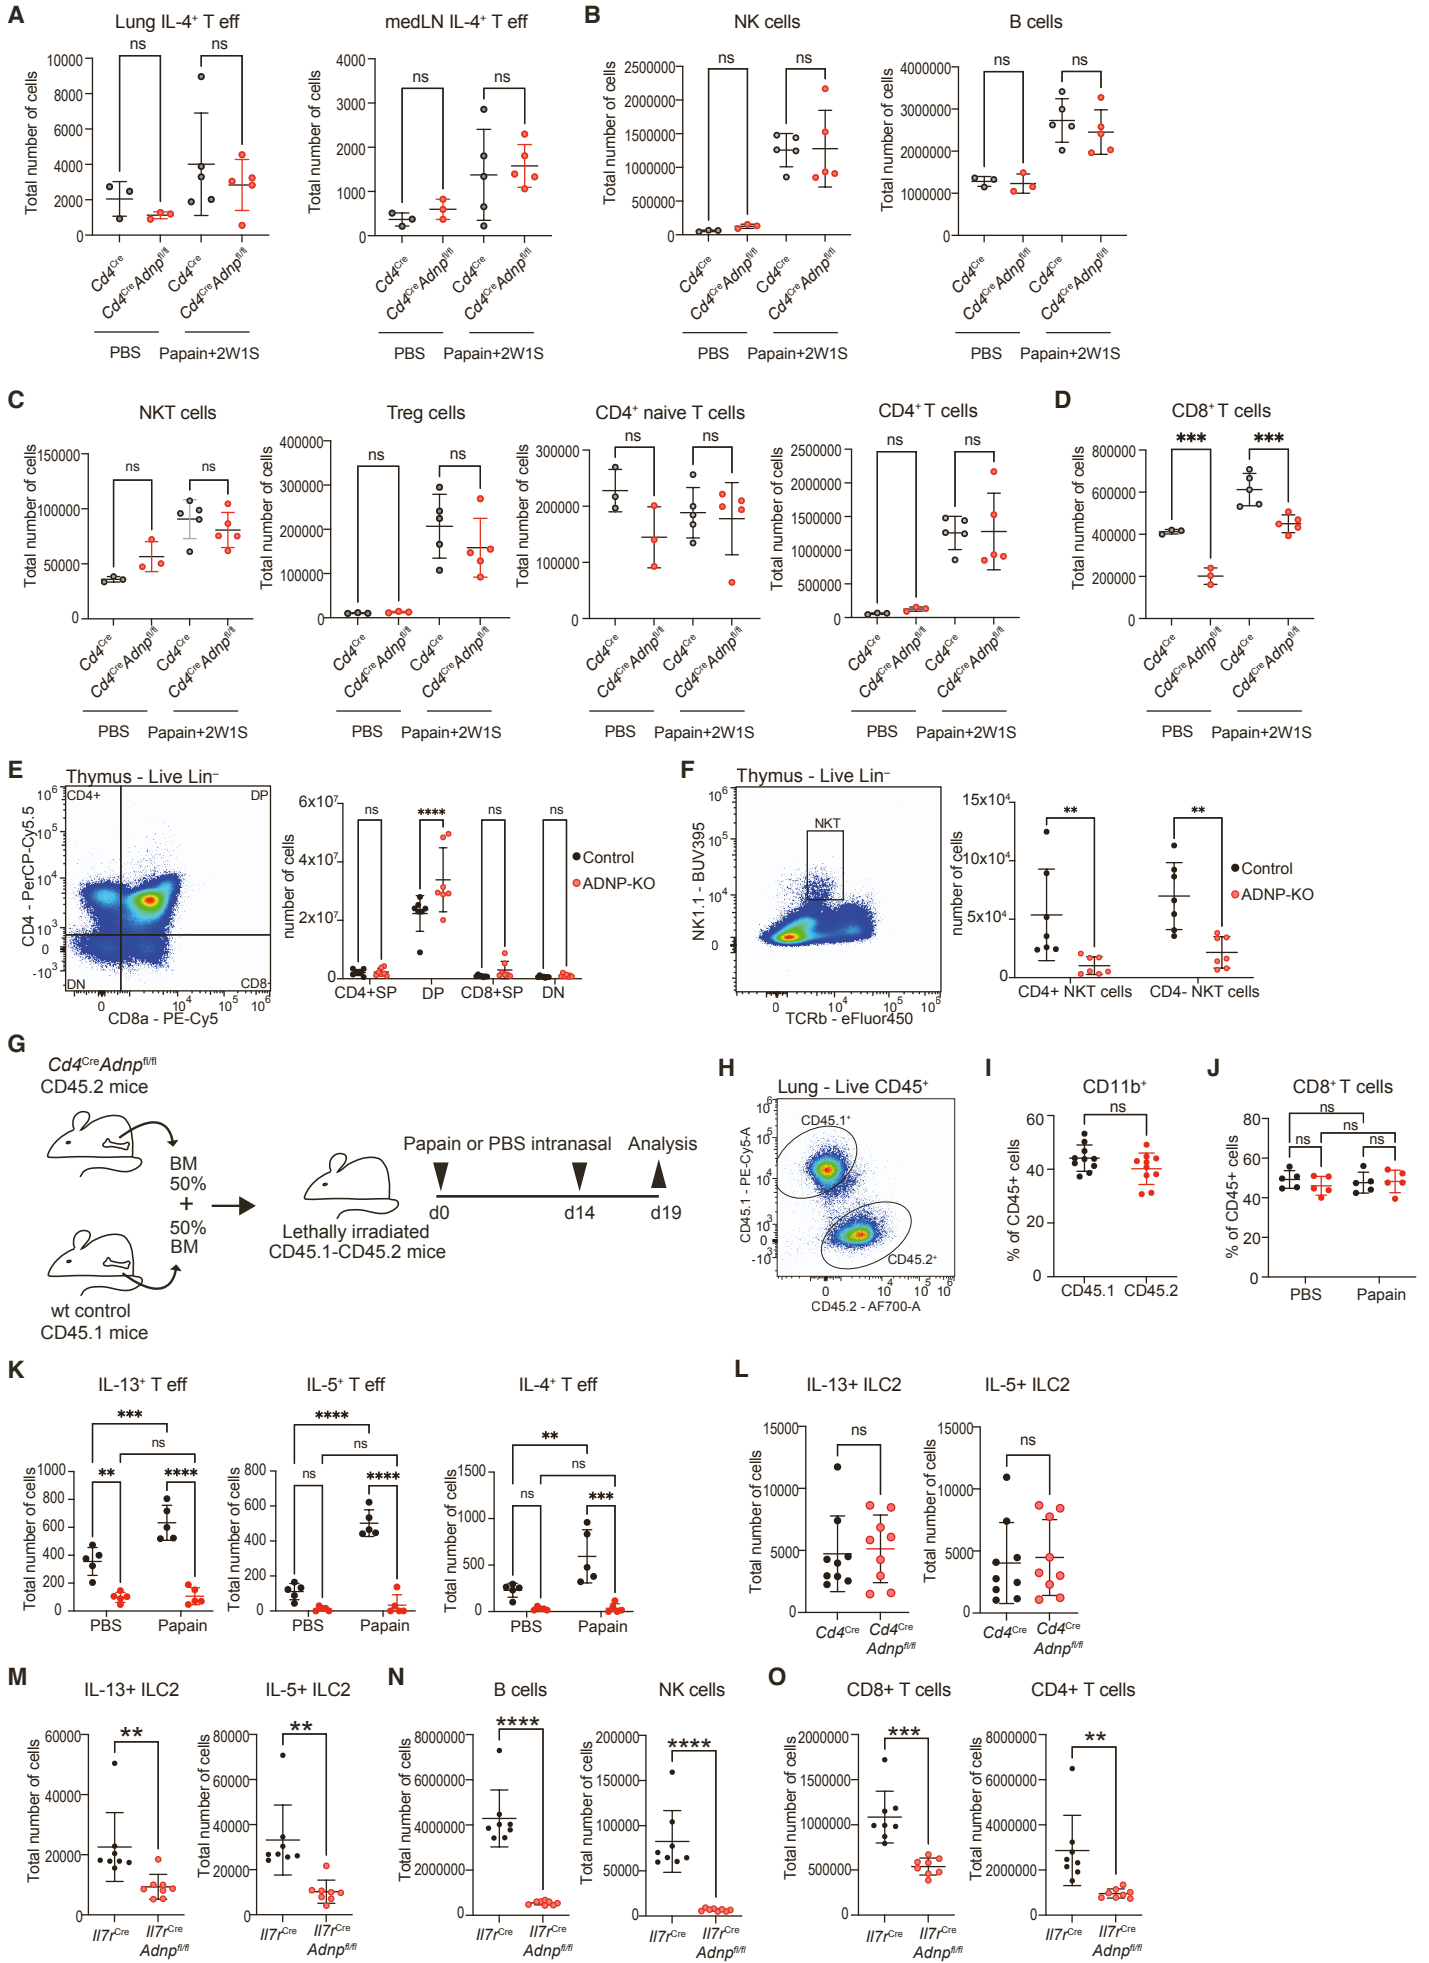

**Figure S2. Lymphocyte populations following papain/2W1S challenge, related to Figure 2.**

(A-D) Flow cytometric analysis of (A) total lung and mediastinal lymph node IL-4-producing Th effector cells, (B) total lung NK and B cells, (C) total lung NKT, Tregs, CD4<sup>+</sup> naïve T cells and CD4<sup>+</sup> T cells, (D) total lung CD8<sup>+</sup> T cells. Comparison between *Cd4<sup>Cre</sup>* mice (black dots) and *Cd4<sup>Cre</sup>Adnp<sup>fl/fl</sup>* mice (red dots) treated with PBS or with papain + 2W1S peptide. Data are representative of 2 independent experiments; data are presented as mean ± SD; one-way ANOVA with Tukey's post-hoc test.

(E) Flow cytometry comparison of thymic CD4 single positive (SP), CD8 SP, CD4/CD8 double positive (DP) and double negative (DN) cells in *Cd4<sup>Cre</sup>* mice (control) and *Cd4<sup>Cre</sup>Adnp<sup>fl/fl</sup>* (ADNP-KO) mice. Data represent two independent experiments; mean ± SD; one-way ANOVA with Tukey's post-hoc test.

(F) Flow cytometry comparison of thymic NKT cells in *Cd4<sup>Cre</sup>* mice (control) and *Cd4<sup>Cre</sup>Adnp<sup>fl/fl</sup>* (ADNP-KO) mice. Data represent two independent experiments; mean ± SD; one-way ANOVA with Tukey's post-hoc test.

(G-K) Bone marrow adoptive transfer experiment.

(G) Schematic representation of the adoptive transfer of bone marrow cells from wildtype (CD45.1) and *Cd4<sup>Cre</sup>Adnp<sup>fl/fl</sup>* (CD45.2) into lethally irradiated (CD45.1-CD45.2) mice followed by induction of type-2 inflammation in the mouse lung with papain.

(H) Gating strategy for CD45.1<sup>+</sup> and CD45.2<sup>+</sup> cells after adoptive transfer of bone marrow cells.

(I) Flow cytometric analysis of CD45.1<sup>+</sup>CD11b<sup>+</sup> and CD45.2<sup>+</sup>CD11b<sup>+</sup> cells shown as percentage of total CD45<sup>+</sup> cells. Data are presented as mean ± s.d.; paired two-sided t-test.

(J-K) Flow cytometric analysis of (J) CD8<sup>+</sup> T cells, (K) IL-13, IL-5 and IL-4 producing Th effector cells originating from control (CD45.1 - black dots) or *Cd4<sup>Cre</sup>Adnp<sup>fl/fl</sup>* (CD45.2- red dots) bone marrow cells after adoptive transfer. Data represent mean ± SD of eight mice ANOVA with Tukey's post-hoc test.

(L) Flow cytometric analysis of lung IL-13 and IL-5-producing ILC2s in *Cd4<sup>Cre</sup>* (black dots) and *Cd4<sup>Cre</sup>Adnp<sup>fl/fl</sup>* (red dots) mice treated with papain + 2W1S peptide. Data are representative of 2 independent experiments; data are presented as mean ± SD; one-way ANOVA with Tukey's post-hoc test.

(M) Flow cytometric analysis of lung IL-13 and IL-5-producing ILC2s in *I17<sup>Cre</sup>* (black dots) and *I17<sup>Cre</sup>Adnp<sup>fl/fl</sup>* (red dots) mice treated with papain + 2W1S peptide. Data are representative of 2 independent experiments; data are presented as mean ± SD; one-way ANOVA with Tukey's post-hoc test.

(N-O) Flow cytometric analysis of lung (N) B cells and NK cells, and (O) CD8<sup>+</sup> and CD4<sup>+</sup> T cells. Comparison between *I17<sup>Cre</sup>* mice (black dots) and *I17<sup>Cre</sup>Adnp<sup>fl/fl</sup>* mice (red dots) treated with papain + 2W1S peptide. Data are representative of 2 independent experiments; data are presented as mean ± SD; one-way ANOVA with Tukey's post-hoc test.

\*\*\*\*P<0.0001, \*\*\*P<0.001, \*\*P<0.01, \*P<0.05, not significant (ns).

Figure S3

A

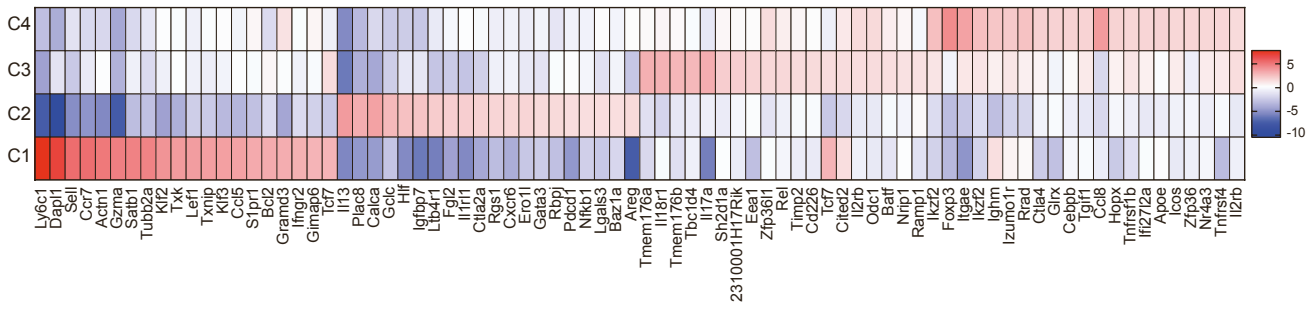

B

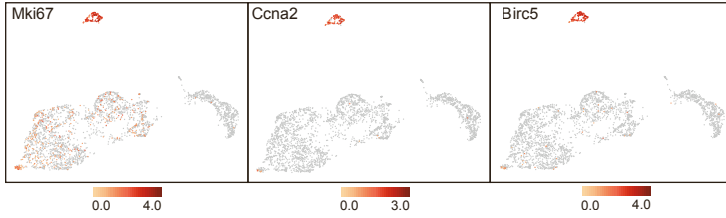

C

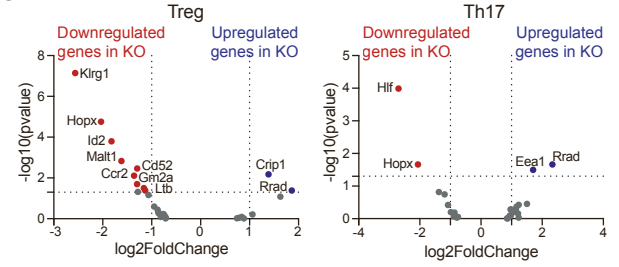

**Figure S3. Single cell expression analysis of naïve and effector T cells, related to Figure 3**

- (A) Heatmap of the top 20 genes differentially expressed in the clusters defined in Figure 3A.
- (B) UMAP plot with expression ( $\log_2$  expression) of indicated genes per individual cell.
- (C) Volcano plot showing the up- and down-regulated genes comparing Th17 cells (cluster 3) and Tregs cells (cluster 4) from  $Cd4^{Cre}$  and  $Cd4^{Cre}Adnp^{fl/fl}$  (KO) mice.

**Figure S4**

**A**

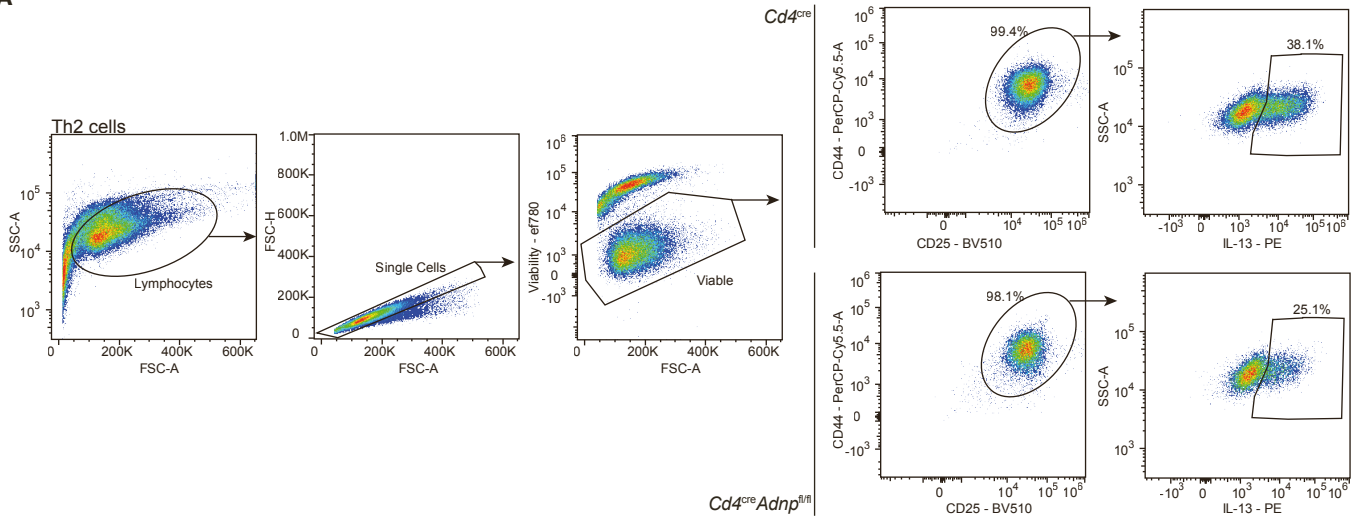

**B**

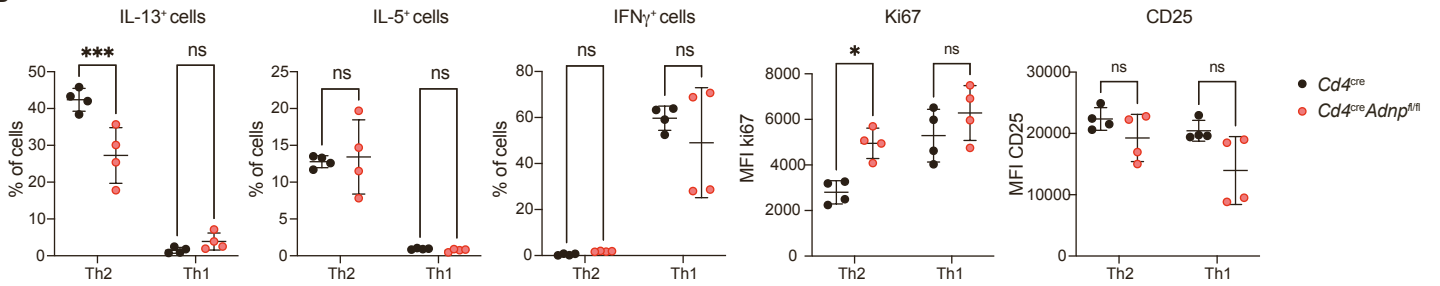

**C**

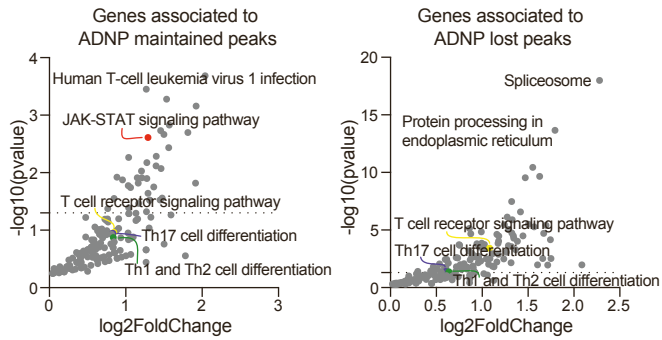

**D**

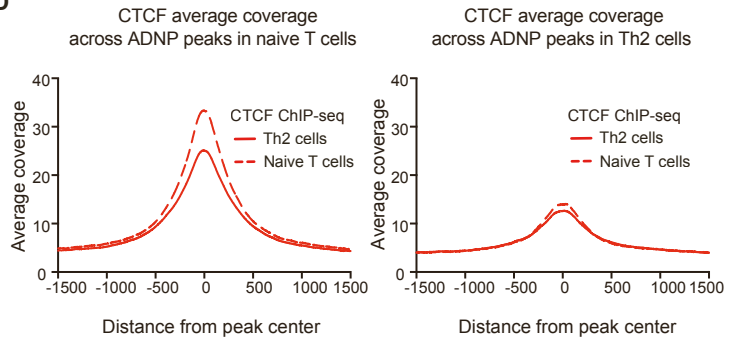



**Figure S4. Validation and analysis of *in vitro* cultured Th2 cells, related to Figure 4**

(A) Gating strategy for cytokine-expressing in *in vitro* differentiated Th1 and Th2 cells.

(B) Flow cytometric analysis of Th1 and Th2 cells after *in vitro* differentiation. Data are shown as percentage of CD44<sup>+</sup>CD25<sup>+</sup> and median fluorescence intensity (MFI) and are presented as mean  $\pm$  s.d.; one-way ANOVA with Tukey's post-hoc test. \*\*\*\*P<0.0001, \*P<0.05, not significant (ns).

(C) KEGG pathway analysis of the genes associated with ADNP maintained peaks (peaks present in Th2 cells and in naïve T cells); and KEGG pathway analysis of the genes associated with ADNP lost peaks (peaks present in naïve T cells but not in Th2 cells). All pathways shown were enriched (p<0.05).

(D) Average CTCF ChIP-seq signal across ADNP peaks in naïve T cells and across ADNP peaks in Th2 cells. Data representative of 2 biological replicates.

**Figure S5**

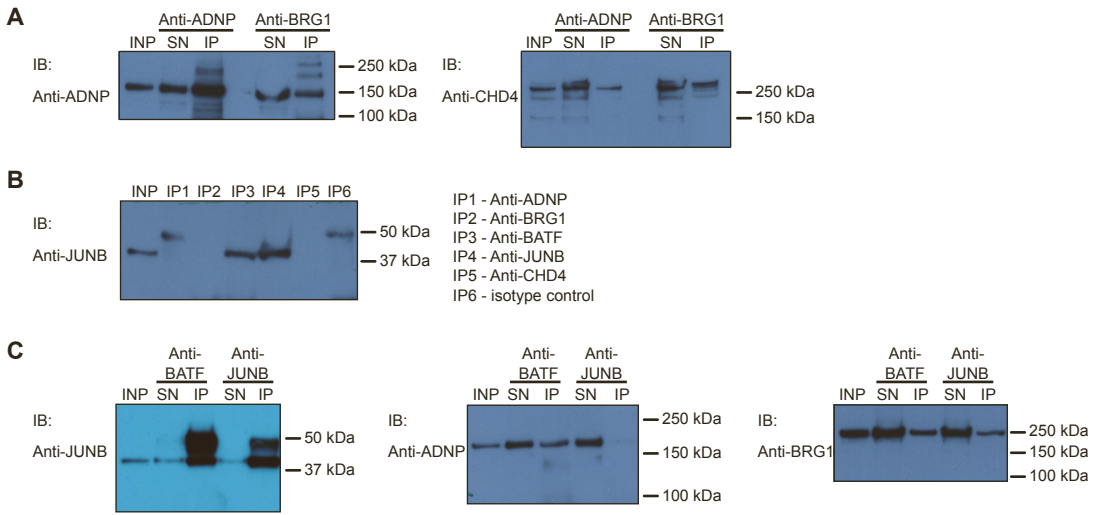

**Figure S5. ADNP forms complexes with BRG1 and BATF in Th2 cells, related to Figure 5.**

(A-C) Lanes were loaded with nuclear extract before immunoprecipitation (INP), supernatant of the immunoprecipitation (SN) or elution of the immunoprecipitation (IP). IB refers to immunoblotting antibody. Data are representative of 2 independent experiments.

(A) Protein associations confirmed by co-immunoprecipitation experiments. Detection of ADNP (150 kDa) and CHD4 (226 kDa) proteins in immunocomplexes generated with Th2 cell nuclear lysate co-immunoprecipitated with anti-ADNP or anti-BRG1 antibodies.

(B) Confirmed of protein associations using co-immunoprecipitation. Detection of JUNB (38 kDa) protein in immunocomplexes generated with Th2 cell nuclear lysate co-immunoprecipitated with anti-ADNP, anti-BRG1, anti-BATF, anti-JUNB, anti-CHD4 or isotype control antibodies.

(C) Confirmed of protein associations using co-immunoprecipitation. Detection of JUNB (38 kDa), ADNP (150 kDa) and BRG1 (181 kDa) proteins in immunocomplexes generated with Th2 cell nuclear lysate co-immunoprecipitated with anti-BATF or anti-JUNB antibodies.

Figure S6

A

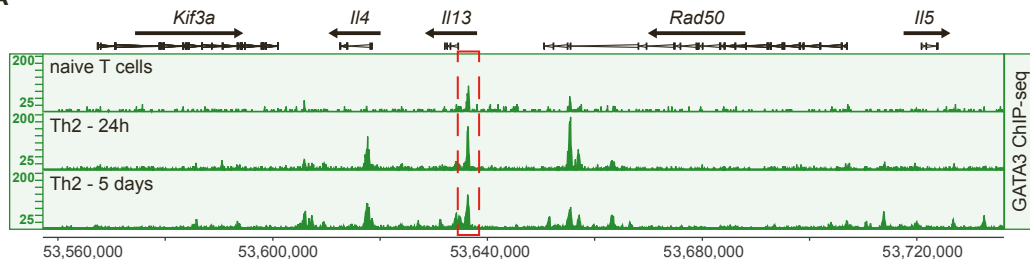

B

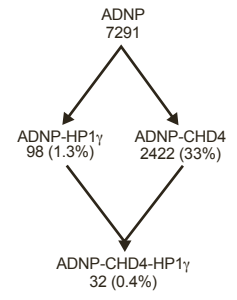

**Figure S6. GATA3 binds to the CGRE before ADNP recruitment, related to Figure 6**

(A) Representative binding profiles of GATA3 in wild type naïve T cells, *Cd4<sup>Cre</sup>* Th2 cells and *Cd4<sup>Cre</sup>Adnp<sup>fl/fl</sup>* Th2 cells in the type-2 cytokine locus. Data representative of 2 biological replicates.

(B) Number and percentage of all ADNP, ADNP-HP1 $\gamma$ , ADNP-CHD4 and ADNP-CHD4- HP1 $\gamma$  overlapping ChIP-seq peaks in Th2 cells. Peak list was generated using two biological replicates.

Figure S7

A

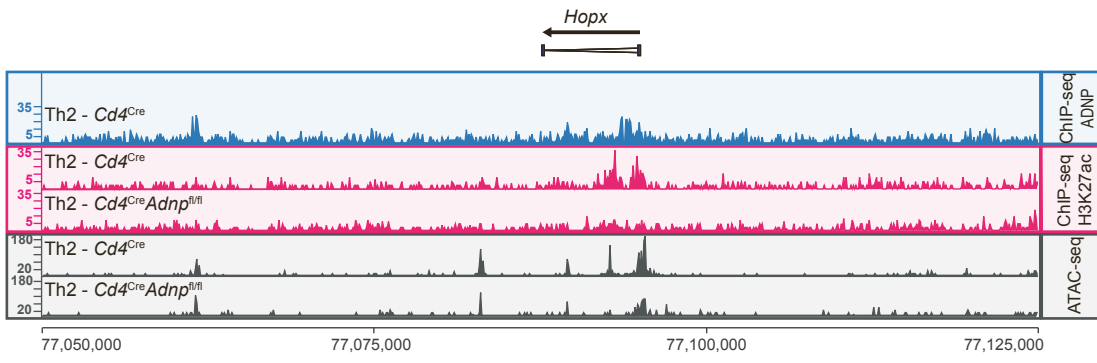

**Figure S7. ChIP-seq and ATAC-seq analysis of *Hopx* locus, related to Figure 7**

(A) Representative ADNP and H3K27ac ChIP-seq, and ATAC-seq tracks in Th2 cells from *Cd4<sup>Cre</sup>* or *Cd4<sup>cre</sup>Adnp<sup>fl/fl</sup>* mice at the *Hopx* locus. Data representative of 2 biological replicates.

Table S2. Differentially expressed genes in RNA-seq data comparing Th2 cells following Adnp-deletion with non-deleted cells, related to Figure 1.

| Upregulated genes   |                      |         |             | Downregulated genes |                      |         |             |
|---------------------|----------------------|---------|-------------|---------------------|----------------------|---------|-------------|
| Gene symbol         | Gene name            | P-value | Fold change | Gene symbol         | Gene name            | P-value | Fold change |
| ENSMUSG00000024592  | <i>C330018D20Rik</i> | 0.00    | -27.15      | ENSMUSG00000001700  | <i>Gramd3</i>        | 0.00    | 44.63       |
| ENSMUSG00000085823  | <i>Gm13012</i>       | 0.00    | -18.44      | ENSMUSG00000104795  | <i>Gm42783</i>       | 0.00    | 32.95       |
| ENSMUSG0000002731   | <i>Prkra</i>         | 0.00    | -18.15      | ENSMUSG00000020099  | <i>Unc5b</i>         | 0.00    | 20.78       |
| ENSMUSG00000003271  | <i>Suit2b1</i>       | 0.01    | -9.97       | ENSMUSG00000018648  | <i>Dusp14</i>        | 0.00    | 20.75       |
| ENSMUSG00000025008  | <i>Tctn3</i>         | 0.01    | -9.43       | ENSMUSG00000033703  | <i>Fcsk</i>          | 0.02    | 19.27       |
| ENSMUSG00000029575  | <i>Mmab</i>          | 0.02    | -9.03       | ENSMUSG00000074064  | <i>Mlycd</i>         | 0.00    | 16.08       |
| ENSMUSG00000025921  | <i>Rdh10</i>         | 0.01    | -8.91       | ENSMUSG00000030200  | <i>Bd2114</i>        | 0.02    | 15.25       |
| ENSMUSG00000042178  | <i>Armc5</i>         | 0.00    | -8.70       | ENSMUSG00000109864  | <i>Eid3</i>          | 0.03    | 13.81       |
| ENSMUSG00000034105  | <i>Meak7</i>         | 0.03    | -7.90       | ENSMUSG00000036882  | <i>Arhgap33</i>      | 0.00    | 13.70       |
| ENSMUSG00000034875  | <i>Nudt19</i>        | 0.01    | -7.68       | ENSMUSG00000021203  | <i>Otub2</i>         | 0.01    | 12.69       |
| ENSMUSG00000042363  | <i>Lgalsl</i>        | 0.01    | -7.48       | ENSMUSG00000020122  | <i>Egfr</i>          | 0.00    | 12.65       |
| ENSMUSG00000062190  | <i>Lanc2l</i>        | 0.00    | -7.37       | ENSMUSG00000109379  | <i>Gm44550</i>       | 0.01    | 12.61       |
| ENSMUSG00000049410  | <i>Zfp683</i>        | 0.01    | -6.83       | ENSMUSG00000030406  | <i>Gipr</i>          | 0.00    | 12.40       |
| ENSMUSG00000091649  | <i>Phf11b</i>        | 0.01    | -6.77       | ENSMUSG00000021485  | <i>Mxd3</i>          | 0.01    | 12.33       |
| ENSMUSG00000026433  | <i>Rab29</i>         | 0.00    | -6.73       | ENSMUSG00000104698  | <i>Gm42602</i>       | 0.02    | 11.91       |
| ENSMUSG00000098322  | <i>5830468F06Rik</i> | 0.02    | -6.73       | ENSMUSG00000003812  | <i>Dnase2a</i>       | 0.00    | 11.81       |
| ENSMUSG00000043079  | <i>Synpo</i>         | 0.02    | -6.25       | ENSMUSG00000097727  | <i>F630040K05Rik</i> | 0.01    | 11.49       |
| ENSMUSG00000029196  | <i>Tada2b</i>        | 0.03    | -6.15       | ENSMUSG00000040272  | <i>Aacc</i>          | 0.05    | 11.21       |
| ENSMUSG00000074738  | <i>Fndc10</i>        | 0.02    | -5.98       | ENSMUSG00000112096  | <i>A430103D13Rik</i> | 0.01    | 11.06       |
| ENSMUSG00000040498  | <i>Igsf23</i>        | 0.03    | -5.89       | ENSMUSG00000037716  | <i>Ccdc33</i>        | 0.00    | 10.49       |
| ENSMUSG00000116858  | <i>Gm49797</i>       | 0.05    | -5.72       | ENSMUSG00000032109  | <i>Nlrx1</i>         | 0.01    | 10.19       |
| ENSMUSG00000029084  | <i>Cd38</i>          | 0.05    | -5.51       | ENSMUSG00000028238  | <i>Atp6v0d2</i>      | 0.02    | 10.17       |
| ENSMUSG00000015189  | <i>Casd1</i>         | 0.01    | -5.19       | ENSMUSG00000020261  | <i>Slk36a1</i>       | 0.04    | 9.77        |
| ENSMUSG00000018919  | <i>Tm4sf5</i>        | 0.03    | -5.06       | ENSMUSG00000106241  | <i>Gm43143</i>       | 0.02    | 9.24        |
| ENSMUSG00000095123  | <i>Gm21781</i>       | 0.00    | -5.05       | ENSMUSG00000030688  | <i>Stard10</i>       | 0.00    | 8.96        |
| ENSMUSG00000073771  | <i>Btbd19</i>        | 0.00    | -5.04       | ENSMUSG00000044934  | <i>Zfp367</i>        | 0.00    | 8.35        |
| ENSMUSG00000001552  | <i>Jup</i>           | 0.05    | -4.88       | ENSMUSG00000104302  | <i>Gm36975</i>       | 0.01    | 8.20        |
| ENSMUSG000000037405 | <i>Icam1</i>         | 0.01    | -4.84       | ENSMUSG00000058258  | <i>Idi1</i>          | 0.01    | 7.91        |
| ENSMUSG00000030443  | <i>Zfp583</i>        | 0.03    | -4.60       | ENSMUSG00000034903  | <i>Cobll1</i>        | 0.00    | 7.54        |
| ENSMUSG00000028225  | <i>Qtrt1</i>         | 0.04    | -4.36       | ENSMUSG00000028217  | <i>Cdh17</i>         | 0.01    | 7.41        |
| ENSMUSG00000038352  | <i>Arl5c</i>         | 0.01    | -4.35       | ENSMUSG00000020021  | <i>Fgd6</i>          | 0.03    | 7.39        |
| ENSMUSG00000054752  | <i>Fsd1l</i>         | 0.02    | -4.20       | ENSMUSG00000031969  | <i>Aacd8</i>         | 0.02    | 7.20        |
| ENSMUSG00000052676  | <i>Zmat1</i>         | 0.04    | -4.13       | ENSMUSG00000033147  | <i>Slk22a15</i>      | 0.01    | 7.11        |
| ENSMUSG00000040557  | <i>Mettl27</i>       | 0.01    | -4.10       | ENSMUSG00000028582  | <i>Cc2d1b</i>        | 0.00    | 7.05        |
| ENSMUSG00000039108  | <i>Lsm14b</i>        | 0.02    | -4.00       | ENSMUSG00000005043  | <i>Sgsh</i>          | 0.03    | 6.81        |
| ENSMUSG00000040652  | <i>Oaz2</i>          | 0.02    | -3.98       | ENSMUSG00000030613  | <i>Ccdc90b</i>       | 0.01    | 6.77        |
| ENSMUSG00000106005  | <i>Gm29151</i>       | 0.04    | -3.87       | ENSMUSG00000053007  | <i>Creb5</i>         | 0.01    | 6.72        |
| ENSMUSG00000042262  | <i>Ccr8</i>          | 0.02    | -3.78       | ENSMUSG00000079043  | <i>Fastkd5</i>       | 0.02    | 6.58        |
| ENSMUSG00000045438  | <i>Cox19</i>         | 0.04    | -3.70       | ENSMUSG00000010655  | <i>Zfp276</i>        | 0.00    | 6.47        |
| ENSMUSG00000117219  | <i>Gm49911</i>       | 0.05    | -3.70       | ENSMUSG00000035439  | <i>Haus8</i>         | 0.03    | 6.44        |
| ENSMUSG00000030612  | <i>Mrp46</i>         | 0.02    | -3.67       | ENSMUSG00000013833  | <i>Med16</i>         | 0.02    | 6.43        |
| ENSMUSG00000035840  | <i>Lysmd3</i>        | 0.02    | -3.66       | ENSMUSG00000104239  | <i>Gm37588</i>       | 0.05    | 6.41        |
| ENSMUSG00000044881  | <i>Coa4</i>          | 0.05    | -3.64       | ENSMUSG00000062729  | <i>Ppox</i>          | 0.01    | 6.30        |
| ENSMUSG00000032067  | <i>Pts</i>           | 0.04    | -3.63       | ENSMUSG00000087574  | <i>C030037D09Rik</i> | 0.02    | 6.07        |
| ENSMUSG00000021271  | <i>Zfp839</i>        | 0.00    | -3.61       | ENSMUSG00000041298  | <i>Katnal1</i>       | 0.02    | 6.07        |
| ENSMUSG00000028690  | <i>Mmachc</i>        | 0.02    | -3.60       | ENSMUSG00000050323  | <i>Ndufaf6</i>       | 0.02    | 5.94        |
| ENSMUSG00000034858  | <i>Fam214a</i>       | 0.04    | -3.53       | ENSMUSG00000104342  | <i>Gm36401</i>       | 0.02    | 5.93        |
| ENSMUSG00000053477  | <i>Tcf4</i>          | 0.03    | -3.52       | ENSMUSG00000043895  | <i>S1pr2</i>         | 0.00    | 5.87        |
| ENSMUSG00000017631  | <i>Abr</i>           | 0.01    | -3.43       | ENSMUSG00000041540  | <i>Sox5</i>          | 0.00    | 5.80        |
| ENSMUSG00000016756  | <i>Cmah</i>          | 0.00    | -3.34       | ENSMUSG00000097300  | <i>Sell</i>          | 0.01    | 5.45        |
| ENSMUSG00000040929  | <i>Rfx3</i>          | 0.01    | -3.34       | ENSMUSG00000037628  | <i>Cdkn3</i>         | 0.03    | 5.23        |
| ENSMUSG00000109652  | <i>Gm45555</i>       | 0.04    | -3.30       | ENSMUSG00000071547  | <i>Nt5dc2</i>        | 0.03    | 5.22        |
| ENSMUSG00000002205  | <i>Vrk3</i>          | 0.03    | -3.25       | ENSMUSG00000025492  | <i>Iftm3</i>         | 0.04    | 5.16        |
| ENSMUSG00000087141  | <i>Plxcd2</i>        | 0.04    | -3.24       | ENSMUSG00000032754  | <i>Slkb1</i>         | 0.03    | 5.11        |
| ENSMUSG00000025997  | <i>Ikzf2</i>         | 0.01    | -3.22       | ENSMUSG00000003518  | <i>Dusp3</i>         | 0.02    | 4.89        |
| ENSMUSG00000036327  | <i>Qsox2</i>         | 0.00    | -3.16       | ENSMUSG00000039450  | <i>Dcxc</i>          | 0.01    | 4.70        |
| ENSMUSG00000005897  | <i>Nr2c1</i>         | 0.03    | -3.13       | ENSMUSG00000029821  | <i>Gsdme</i>         | 0.00    | 4.69        |
| ENSMUSG00000025979  | <i>Mob4</i>          | 0.01    | -3.10       | ENSMUSG00000038301  | <i>Snx10</i>         | 0.00    | 4.61        |
| ENSMUSG00000073096  | <i>Lrrc61</i>        | 0.00    | -3.10       | ENSMUSG00000048120  | <i>Entpd1</i>        | 0.04    | 4.61        |
| ENSMUSG00000037824  | <i>Tspan14</i>       | 0.02    | -3.10       | ENSMUSG00000035640  | <i>Cbarp</i>         | 0.03    | 4.57        |
| ENSMUSG00000026810  | <i>Dpm2</i>          | 0.02    | -3.08       | ENSMUSG00000024070  | <i>Prkd3</i>         | 0.02    | 4.49        |
| ENSMUSG00000041143  | <i>Tmco4</i>         | 0.02    | -3.06       | ENSMUSG00000037949  | <i>Ano10</i>         | 0.03    | 4.49        |
| ENSMUSG00000038034  | <i>Igsf8</i>         | 0.02    | -3.05       | ENSMUSG00000091586  | <i>Cyp4f17</i>       | 0.01    | 4.47        |
| ENSMUSG00000026018  | <i>Ica1l</i>         | 0.05    | -3.02       | ENSMUSG00000054770  | <i>Kctd18</i>        | 0.02    | 4.47        |
| ENSMUSG00000033706  | <i>Smyd5</i>         | 0.02    | -2.97       | ENSMUSG00000018916  | <i>Csf2</i>          | 0.03    | 4.46        |
| ENSMUSG00000024588  | <i>Fech</i>          | 0.01    | -2.97       | ENSMUSG00000011254  | <i>Thg1l</i>         | 0.01    | 4.40        |
| ENSMUSG00000024778  | <i>Fas</i>           | 0.02    | -2.92       | ENSMUSG00000021285  | <i>Ppp1r13b</i>      | 0.03    | 4.31        |
| ENSMUSG00000050079  | <i>Rspry1</i>        | 0.01    | -2.88       | ENSMUSG00000055866  | <i>Per2</i>          | 0.03    | 4.31        |
| ENSMUSG00000025078  | <i>Nhlrc2</i>        | 0.02    | -2.88       | ENSMUSG00000022160  | <i>Mettl3</i>        | 0.04    | 4.24        |
| ENSMUSG00000028990  | <i>Lzic</i>          | 0.03    | -2.84       | ENSMUSG00000042705  | <i>Commdd10</i>      | 0.01    | 4.24        |
| ENSMUSG00000028655  | <i>Mfsd2a</i>        | 0.01    | -2.83       | ENSMUSG00000058886  | <i>Deaf1</i>         | 0.04    | 4.19        |
| ENSMUSG00000038387  | <i>Rras</i>          | 0.01    | -2.72       | ENSMUSG00000006191  | <i>Cdkal1</i>        | 0.00    | 4.17        |
| ENSMUSG00000027495  | <i>Fam210b</i>       | 0.03    | -2.68       | ENSMUSG00000030880  | <i>Polr3e</i>        | 0.03    | 4.17        |
| ENSMUSG00000060733  | <i>Ipmk</i>          | 0.02    | -2.64       | ENSMUSG00000040596  | <i>Pogk</i>          | 0.01    | 4.16        |
| ENSMUSG00000059149  | <i>Mfsd4a</i>        | 0.04    | -2.62       | ENSMUSG00000104339  | <i>C130089K02Rik</i> | 0.02    | 4.14        |
| ENSMUSG00000067629  | <i>Syngap1</i>       | 0.02    | -2.55       | ENSMUSG00000026698  | <i>Pigc</i>          | 0.02    | 4.06        |



|                     |                 |      |       |
|---------------------|-----------------|------|-------|
| ENSMUSG0000062202   | <i>Btbd9</i>    | 0.05 | -2.54 |
| ENSMUSG0000073684   | <i>Faap20</i>   | 0.04 | -2.52 |
| ENSMUSG00000038119  | <i>Cdon</i>     | 0.00 | -2.52 |
| ENSMUSG00000075376  | <i>Rc3h2</i>    | 0.01 | -2.51 |
| ENSMUSG00000028394  | <i>Pole3</i>    | 0.04 | -2.50 |
| ENSMUSG00000039298  | <i>Cdk5rap2</i> | 0.04 | -2.45 |
| ENSMUSG00000074604  | <i>Mgst2</i>    | 0.02 | -2.43 |
| ENSMUSG00000103175  | <i>Gm37169</i>  | 0.00 | -2.43 |
| ENSMUSG00000073008  | <i>Gpr174</i>   | 0.00 | -2.43 |
| ENSMUSG00000028341  | <i>Nr4a3</i>    | 0.02 | -2.42 |
| ENSMUSG00000030965  | <i>Abraxas2</i> | 0.03 | -2.39 |
| ENSMUSG00000026483  | <i>Fam129a</i>  | 0.02 | -2.38 |
| ENSMUSG00000011382  | <i>Dhdh</i>     | 0.01 | -2.37 |
| ENSMUSG00000024370  | <i>Cdc23</i>    | 0.00 | -2.37 |
| ENSMUSG00000056708  | <i>Ier5</i>     | 0.03 | -2.34 |
| ENSMUSG00000003731  | <i>Kpna6</i>    | 0.03 | -2.33 |
| ENSMUSG000000041755 | <i>Coasy</i>    | 0.04 | -2.31 |
| ENSMUSG00000071647  | <i>Emi3</i>     | 0.04 | -2.27 |
| ENSMUSG00000042111  | <i>Ccdc115</i>  | 0.00 | -2.27 |
| ENSMUSG00000038002  | <i>Cramp1l</i>  | 0.01 | -2.27 |
| ENSMUSG000000040289 | <i>Faap24</i>   | 0.04 | -2.27 |
| ENSMUSG00000020346  | <i>Mgat1</i>    | 0.05 | -2.26 |
| ENSMUSG00000023965  | <i>Fbxl17</i>   | 0.01 | -2.26 |
| ENSMUSG00000040123  | <i>Zmym5</i>    | 0.01 | -2.22 |
| ENSMUSG000000041815 | <i>Palp3</i>    | 0.03 | -2.21 |
| ENSMUSG00000031711  | <i>Zfp330</i>   | 0.05 | -2.19 |
| ENSMUSG00000074480  | <i>Mex3a</i>    | 0.03 | -2.19 |
| ENSMUSG00000028599  | <i>Tnfrsf1b</i> | 0.03 | -2.18 |
| ENSMUSG000000064289 | <i>Tank</i>     | 0.00 | -2.18 |
| ENSMUSG00000035772  | <i>Mrps2</i>    | 0.05 | -2.18 |
| ENSMUSG00000023460  | <i>Rab12</i>    | 0.04 | -2.17 |
| ENSMUSG00000049232  | <i>Tigd2</i>    | 0.04 | -2.15 |
| ENSMUSG00000030264  | <i>Thumpd3</i>  | 0.03 | -2.15 |
| ENSMUSG00000042312  | <i>S100a13</i>  | 0.01 | -2.13 |
| ENSMUSG00000043510  | <i>Hscb</i>     | 0.03 | -2.12 |
| ENSMUSG00000027351  | <i>Spred1</i>   | 0.04 | -2.12 |
| ENSMUSG00000053134  | <i>Supt17l</i>  | 0.00 | -2.06 |
| ENSMUSG00000041225  | <i>Arhgap12</i> | 0.01 | -2.05 |
| ENSMUSG00000070923  | <i>Klhl9</i>    | 0.02 | -2.04 |
| ENSMUSG00000032115  | <i>Hyou1</i>    | 0.02 | -2.03 |
| ENSMUSG000000032612 | <i>Usp4</i>     | 0.04 | -2.02 |

|                     |                      |      |      |
|---------------------|----------------------|------|------|
| ENSMUSG00000028199  | <i>Cryz</i>          | 0.01 | 4.05 |
| ENSMUSG00000018914  | <i>I1B</i>           | 0.02 | 4.00 |
| ENSMUSG00000034973  | <i>Dop1a</i>         | 0.00 | 3.95 |
| ENSMUSG00000027459  | <i>Fam110a</i>       | 0.01 | 3.93 |
| ENSMUSG00000015944  | <i>Castor2</i>       | 0.00 | 3.92 |
| ENSMUSG00000021461  | <i>Fancc</i>         | 0.03 | 3.87 |
| ENSMUSG00000027864  | <i>Ptgrfn</i>        | 0.00 | 3.87 |
| ENSMUSG00000047242  | <i>Taf9b</i>         | 0.03 | 3.85 |
| ENSMUSG00000076761  | <i>Trav5-1</i>       | 0.02 | 3.85 |
| ENSMUSG00000007603  | <i>Dus3l</i>         | 0.04 | 3.83 |
| ENSMUSG00000059866  | <i>Tnip2</i>         | 0.01 | 3.81 |
| ENSMUSG00000040888  | <i>Gfer</i>          | 0.01 | 3.74 |
| ENSMUSG00000046731  | <i>Kctd11</i>        | 0.01 | 3.73 |
| ENSMUSG00000033902  | <i>Mapkbp1</i>       | 0.03 | 3.72 |
| ENSMUSG00000087384  | <i>Gm15558</i>       | 0.03 | 3.68 |
| ENSMUSG00000033632  | <i>AW554918</i>      | 0.04 | 3.67 |
| ENSMUSG00000028073  | <i>Pear1</i>         | 0.05 | 3.67 |
| ENSMUSG00000020741  | <i>Cluh</i>          | 0.03 | 3.67 |
| ENSMUSG00000030600  | <i>Lrfrn1</i>        | 0.03 | 3.63 |
| ENSMUSG000000110206 | <i>Flt3l</i>         | 0.02 | 3.57 |
| ENSMUSG00000039474  | <i>Wfs1</i>          | 0.04 | 3.53 |
| ENSMUSG00000021703  | <i>Serinc5</i>       | 0.00 | 3.53 |
| ENSMUSG00000015647  | <i>Lama5</i>         | 0.00 | 3.52 |
| ENSMUSG00000037816  | <i>Fbxw17</i>        | 0.03 | 3.51 |
| ENSMUSG00000031802  | <i>Phx4</i>          | 0.02 | 3.49 |
| ENSMUSG00000022479  | <i>Vdr</i>           | 0.01 | 3.49 |
| ENSMUSG00000000441  | <i>Raf1</i>          | 0.01 | 3.48 |
| ENSMUSG00000037239  | <i>Spred3</i>        | 0.01 | 3.46 |
| ENSMUSG00000030203  | <i>Dusp16</i>        | 0.00 | 3.39 |
| ENSMUSG00000038542  | <i>Pad2</i>          | 0.00 | 3.36 |
| ENSMUSG00000074151  | <i>Nlrc5</i>         | 0.01 | 3.35 |
| ENSMUSG00000066149  | <i>Cdc26</i>         | 0.02 | 3.35 |
| ENSMUSG00000026274  | <i>Pask</i>          | 0.02 | 3.34 |
| ENSMUSG00000026014  | <i>Raph1</i>         | 0.00 | 3.31 |
| ENSMUSG00000047751  | <i>Utf1</i>          | 0.04 | 3.25 |
| ENSMUSG00000032041  | <i>Tirap</i>         | 0.00 | 3.22 |
| ENSMUSG00000023235  | <i>Cd25</i>          | 0.02 | 3.19 |
| ENSMUSG00000020537  | <i>Drp2</i>          | 0.02 | 3.18 |
| ENSMUSG00000022464  | <i>Rail4</i>         | 0.03 | 3.17 |
| ENSMUSG00000025743  | <i>Sdc3</i>          | 0.01 | 3.15 |
| ENSMUSG00000006058  | <i>Snf8</i>          | 0.00 | 3.13 |
| ENSMUSG00000055435  | <i>Maf</i>           | 0.01 | 3.13 |
| ENSMUSG00000027293  | <i>Ehd4</i>          | 0.00 | 3.12 |
| ENSMUSG00000033880  | <i>Lgals3bp</i>      | 0.03 | 3.07 |
| ENSMUSG000000109005 | <i>Gm45221</i>       | 0.02 | 3.05 |
| ENSMUSG00000033323  | <i>Ctdp1</i>         | 0.02 | 3.04 |
| ENSMUSG00000020453  | <i>Patz1</i>         | 0.05 | 3.04 |
| ENSMUSG00000000869  | <i>I4</i>            | 0.00 | 3.01 |
| ENSMUSG00000031913  | <i>Vps4a</i>         | 0.01 | 3.01 |
| ENSMUSG00000022668  | <i>Gtpbp8</i>        | 0.05 | 3.01 |
| ENSMUSG00000054676  | <i>1600014C10Rik</i> | 0.02 | 3.00 |
| ENSMUSG00000033629  | <i>Hacd3</i>         | 0.03 | 2.99 |
| ENSMUSG000000102336 | <i>Gm37233</i>       | 0.00 | 2.98 |
| ENSMUSG00000096188  | <i>Cmtm4</i>         | 0.03 | 2.92 |
| ENSMUSG00000026766  | <i>Mmadhc</i>        | 0.01 | 2.90 |
| ENSMUSG00000031577  | <i>Tti2</i>          | 0.03 | 2.88 |
| ENSMUSG00000028683  | <i>Ejfb3</i>         | 0.03 | 2.85 |
| ENSMUSG00000029387  | <i>Gtf2h3</i>        | 0.01 | 2.85 |
| ENSMUSG00000039959  | <i>Hip1</i>          | 0.01 | 2.83 |
| ENSMUSG00000024781  | <i>Lipa</i>          | 0.01 | 2.82 |
| ENSMUSG00000059895  | <i>Ptp4a3</i>        | 0.01 | 2.81 |
| ENSMUSG00000043671  | <i>Dpy19l3</i>       | 0.05 | 2.78 |
| ENSMUSG00000079215  | <i>Zfp664</i>        | 0.02 | 2.75 |
| ENSMUSG00000023951  | <i>Vegfa</i>         | 0.00 | 2.75 |
| ENSMUSG00000031266  | <i>Gla</i>           | 0.02 | 2.68 |
| ENSMUSG00000029176  | <i>Anapc4</i>        | 0.00 | 2.68 |
| ENSMUSG00000035790  | <i>Cep19</i>         | 0.01 | 2.66 |
| ENSMUSG00000023286  | <i>Ube2j2</i>        | 0.02 | 2.66 |
| ENSMUSG00000024829  | <i>Mrpl21</i>        | 0.01 | 2.65 |
| ENSMUSG00000016028  | <i>Celsr1</i>        | 0.00 | 2.64 |
| ENSMUSG00000032601  | <i>Prkar2a</i>       | 0.00 | 2.63 |
| ENSMUSG00000034187  | <i>Nsf</i>           | 0.00 | 2.63 |
| ENSMUSG00000021629  | <i>Sik3oa5</i>       | 0.04 | 2.60 |
| ENSMUSG0000002797   | <i>Ggct</i>          | 0.05 | 2.55 |
| ENSMUSG00000061981  | <i>Flot2</i>         | 0.02 | 2.54 |
| ENSMUSG00000028559  | <i>Osbpl9</i>        | 0.04 | 2.54 |
| ENSMUSG00000027447  | <i>Cst3</i>          | 0.03 | 2.54 |
| ENSMUSG00000026749  | <i>Nek6</i>          | 0.00 | 2.47 |
| ENSMUSG00000056498  | <i>Tmem154</i>       | 0.02 | 2.46 |
| ENSMUSG00000026830  | <i>Ernm</i>          | 0.01 | 2.44 |
| ENSMUSG00000042625  | <i>Safb2</i>         | 0.04 | 2.44 |

|                    |                      |      |      |
|--------------------|----------------------|------|------|
| ENSMUSG00000020948 | <i>Klh28</i>         | 0.03 | 2.42 |
| ENSMUSG00000103391 | <i>Gm38302</i>       | 0.04 | 2.41 |
| ENSMUSG00000030469 | <i>Zfp719</i>        | 0.04 | 2.41 |
| ENSMUSG00000029401 | <i>Rip12</i>         | 0.00 | 2.39 |
| ENSMUSG00000047454 | <i>Gphn</i>          | 0.01 | 2.37 |
| ENSMUSG00000040462 | <i>Oss9</i>          | 0.02 | 2.36 |
| ENSMUSG00000037373 | <i>Ctbp1</i>         | 0.04 | 2.36 |
| ENSMUSG00000039153 | <i>Runx2</i>         | 0.01 | 2.32 |
| ENSMUSG00000015536 | <i>Mocs2</i>         | 0.03 | 2.31 |
| ENSMUSG00000030990 | <i>Pgap2</i>         | 0.04 | 2.30 |
| ENSMUSG00000042726 | <i>Traf1</i>         | 0.01 | 2.27 |
| ENSMUSG00000026568 | <i>Mpc2</i>          | 0.03 | 2.26 |
| ENSMUSG00000104291 | <i>A130071D04Rik</i> | 0.04 | 2.26 |
| ENSMUSG00000043154 | <i>Ppp2r3a</i>       | 0.01 | 2.26 |
| ENSMUSG00000062270 | <i>Morf4l1</i>       | 0.01 | 2.25 |
| ENSMUSG00000064181 | <i>Rab3ip</i>        | 0.02 | 2.25 |
| ENSMUSG00000000194 | <i>Gpr107</i>        | 0.01 | 2.25 |
| ENSMUSG00000018398 | <i>Septin8</i>       | 0.03 | 2.22 |
| ENSMUSG00000024130 | <i>Aba3</i>          | 0.03 | 2.21 |
| ENSMUSG00000030659 | <i>Nucb2</i>         | 0.01 | 2.20 |
| ENSMUSG00000039318 | <i>Rab3gap2</i>      | 0.01 | 2.18 |
| ENSMUSG00000034021 | <i>Pds5b</i>         | 0.02 | 2.17 |
| ENSMUSG00000038214 | <i>Bend3</i>         | 0.02 | 2.15 |
| ENSMUSG00000024007 | <i>Ppil1</i>         | 0.05 | 2.15 |
| ENSMUSG00000029910 | <i>Mad2l1</i>        | 0.02 | 2.14 |
| ENSMUSG00000013662 | <i>Atad1</i>         | 0.04 | 2.12 |
| ENSMUSG00000022685 | <i>Parn</i>          | 0.01 | 2.11 |
| ENSMUSG00000028772 | <i>Zcchc17</i>       | 0.03 | 2.09 |
| ENSMUSG00000057649 | <i>Brd9</i>          | 0.03 | 2.07 |
| ENSMUSG00000031813 | <i>Mvb12a</i>        | 0.04 | 2.05 |
| ENSMUSG00000030286 | <i>Emc3</i>          | 0.00 | 2.02 |
| ENSMUSG00000011179 | <i>Odc1</i>          | 0.03 | 2.02 |
| ENSMUSG00000019979 | <i>Apaf1</i>         | 0.01 | 2.00 |

Table S3. KEGG pathway analysis of the genes associated to ADNP peaks in Th2 cells, related to Figure 4.

| Term                                                     | log2FoldChange    | -Log10(pvalue) |
|----------------------------------------------------------|-------------------|----------------|
| Pathways in cancer                                       | 0.896310577179861 | 8.899639752    |
| Th1 and Th2 cell differentiation                         | 1.98043531241309  | 8.753305558    |
| Th17 cell differentiation                                | 1.76564716172519  | 8.013879289    |
| JAK-STAT signaling pathway                               | 1.4130646456827   | 7.815124537    |
| T cell receptor signaling pathway                        | 1.67047451480334  | 7.106680533    |
| Thyroid hormone signaling pathway                        | 1.4815761505588   | 6.279771765    |
| p53 signaling pathway                                    | 1.74194628189252  | 5.655094698    |
| Hepatitis B                                              | 1.18603154380679  | 5.508270982    |
| Human T-cell leukemia virus 1 infection                  | 0.930648014501768 | 4.916323398    |
| Osteoclast differentiation                               | 1.24399800998024  | 4.910145577    |
| Small cell lung cancer                                   | 1.43824161586732  | 4.886122366    |
| MAPK signaling pathway                                   | 0.83799240009741  | 4.713395787    |
| Regulation of actin cytoskeleton                         | 0.958481354228799 | 4.693042021    |
| Chronic myeloid leukemia                                 | 1.49772800702011  | 4.484146972    |
| Measles                                                  | 1.0931439309215   | 4.255398949    |
| Apoptosis                                                | 1.03976730156872  | 3.816990684    |
| Adherens junction                                        | 1.36342198494941  | 3.598004337    |
| Proteoglycans in cancer                                  | 0.849943835879489 | 3.578042046    |
| Leukocyte transendothelial migration                     | 1.08285576196112  | 3.478885214    |
| Human cytomegalovirus infection                          | 0.731122775503737 | 3.301206219    |
| Inflammatory bowel disease (IBD)                         | 1.41764126080508  | 3.279119638    |
| Colorectal cancer                                        | 1.17475112426983  | 3.240442986    |
| Rap1 signaling pathway                                   | 0.792083167191249 | 3.239806306    |
| NF-kappa B signaling pathway                             | 1.07904334898118  | 3.13968771     |
| C-type lectin receptor signaling pathway                 | 1.01535434729982  | 3.041471096    |
| Neurotrophin signaling pathway                           | 0.977993785339682 | 3.029805967    |
| Hepatocellular carcinoma                                 | 0.834003571851602 | 3.024282206    |
| Non-small cell lung cancer                               | 1.2731495194613   | 2.964906282    |
| Pancreatic cancer                                        | 1.18591979537282  | 2.8994984      |
| FoxO signaling pathway                                   | 0.914632842384355 | 2.891957942    |
| Chemokine signaling pathway                              | 0.759109753219616 | 2.879640638    |
| Kaposi sarcoma-associated herpesvirus infection          | 0.727337176682901 | 2.877866889    |
| Toxoplasmosis                                            | 0.961478897746632 | 2.693409514    |
| cAMP signaling pathway                                   | 0.700445526377739 | 2.657193068    |
| Insulin resistance                                       | 0.92430963778094  | 2.55753113     |
| TNF signaling pathway                                    | 0.92430963778094  | 2.55753113     |
| PI3K-Akt signaling pathway                               | 0.532652061495029 | 2.532664588    |
| Epstein-Barr virus infection                             | 0.648991410107192 | 2.497879794    |
| Leishmaniasis                                            | 1.14130813421849  | 2.485799551    |
| Renal cell carcinoma                                     | 1.11019387930504  | 2.400657166    |
| Wnt signaling pathway                                    | 0.737362282365623 | 2.347898844    |
| Viral carcinogenesis                                     | 0.614166505725594 | 2.290136317    |
| Insulin signaling pathway                                | 0.757334445863519 | 2.208541569    |
| Platelet activation                                      | 0.794434780249947 | 2.203015932    |
| Glioma                                                   | 1.00387435465186  | 2.192117       |
| Oxytocin signaling pathway                               | 0.714042250439738 | 2.170618437    |
| Focal adhesion                                           | 0.621350310771721 | 2.10755219     |
| B cell receptor signaling pathway                        | 0.992007898931744 | 2.086443427    |
| Natural killer cell mediated cytotoxicity                | 0.78444646769435  | 2.071043345    |
| Breast cancer                                            | 0.701813889111462 | 2.043961956    |
| AGE-RAGE signaling pathway in diabetic complications     | 0.81807349240271  | 1.975130928    |
| Transcriptional misregulation in cancer                  | 0.614636906867805 | 1.954106558    |
| Hippo signaling pathway                                  | 0.652203023301662 | 1.934391062    |
| Vascular smooth muscle contraction                       | 0.688348256117813 | 1.91740868     |
| Aldosterone synthesis and secretion                      | 0.798620659875491 | 1.91724637     |
| Parathyroid hormone synthesis, secretion and action      | 0.776198830064104 | 1.899781426    |
| Hepatitis C                                              | 0.640142629131631 | 1.889724583    |
| Cellular senescence                                      | 0.593850913771571 | 1.871385917    |
| Adipocytokine signaling pathway                          | 0.921196545283092 | 1.839969011    |
| Signaling pathways regulating pluripotency of stem cells | 0.674024638737121 | 1.830485931    |
| Cell cycle                                               | 0.703390070731073 | 1.80853872     |
| Endometrial cancer                                       | 1.00121285844965  | 1.807937943    |
| GnRH signaling pathway                                   | 0.812639675637535 | 1.801243874    |
| cGMP-PKG signaling pathway                               | 0.597703725733847 | 1.796723547    |
| Insulin secretion                                        | 0.818193294231804 | 1.762452258    |
| Fc epsilon RI signaling pathway                          | 0.904664314978368 | 1.736118913    |
| Oocyte meiosis                                           | 0.687384748749352 | 1.679721199    |
| Axon guidance                                            | 0.557177531893221 | 1.676126758    |
| Cytokine-cytokine receptor interaction                   | 0.441940384009462 | 1.67217606     |
| Glucagon signaling pathway                               | 0.724553772156384 | 1.659818821    |
| Longevity regulating pathway                             | 0.724553772156384 | 1.659818821    |
| Human papillomavirus infection                           | 0.397660121629863 | 1.65830753     |
| Bacterial invasion of epithelial cells                   | 0.838472211960026 | 1.645743047    |
| Gastric acid secretion                                   | 0.838472211960026 | 1.645743047    |
| ErbB signaling pathway                                   | 0.776811741128923 | 1.607153262    |
| Intestinal immune network for IgA production             | 1.06412606536533  | 1.601962698    |
| Hematopoietic cell lineage                               | 0.727400885357647 | 1.579116893    |
| Adrenergic signaling in cardiomyocytes                   | 0.581713282037688 | 1.563050365    |
| Tuberculosis                                             | 0.532567696581932 | 1.562684613    |
| Gap junction                                             | 0.730833158190224 | 1.497603529    |
| IL-17 signaling pathway                                  | 0.707573076899093 | 1.486468092    |
| Melanoma                                                 | 0.791104172114158 | 1.486078066    |
| Prolactin signaling pathway                              | 0.791104172114158 | 1.486078066    |
| Gastric cancer                                           | 0.556226757861551 | 1.483269896    |
| AMPK signaling pathway                                   | 0.593910102230119 | 1.447681928    |
| Fc gamma R-mediated phagocytosis                         | 0.708377890547675 | 1.445289381    |
| Endocytosis                                              | 0.410650520799807 | 1.438404287    |
| Salivary secretion                                       | 0.735029080692873 | 1.415142538    |

| Term                                   | log2FoldChange    | -Log10(pvalue) |
|----------------------------------------|-------------------|----------------|
| Arginine and proline metabolism        | 0.90790429916245  | 1.411890225    |
| Central carbon metabolism in cancer    | 0.80365193496353  | 1.404411055    |
| Acute myeloid leukemia                 | 0.76834977050353  | 1.387419014    |
| Fluid shear stress and atherosclerosis | 0.535059348825809 | 1.366613985    |
| Apelin signaling pathway               | 0.544031719352161 | 1.365676563    |
| Ubiquitin mediated proteolysis         | 0.544031719352161 | 1.365676563    |
| Cushing syndrome                       | 0.499566217684824 | 1.336106198    |
| Choline metabolism in cancer           | 0.627427726574016 | 1.334651892    |
| Sphingolipid signaling pathway         | 0.559771873634829 | 1.325287742    |

Table S4. Genes associated to the highlighted KEGG pathways, related to Figure 4.

| Th1 and Th2 cell differentiation | Th17 cell differentiation | JAK-STAT signaling pathway | T cell receptor signaling pathway |
|----------------------------------|---------------------------|----------------------------|-----------------------------------|
| CD3D                             | AHR                       | AKT2                       | AKT2                              |
| FOS                              | CD3D                      | AKT3                       | AKT3                              |
| GATA3                            | FOS                       | BCL2L1                     | CARD11                            |
| H2-AA                            | GATA3                     | CCND2                      | CBLB                              |
| IL12A                            | H2-AA                     | CCND3                      | CD3D                              |
| IL13                             | HIF1A                     | CDKN1A                     | CD8B1                             |
| IL2                              | IL17D                     | CISH                       | CDC42                             |
| IL2RA                            | IL1RAP                    | CRLF2                      | FOS                               |
| IL2RB                            | IL2                       | CSF2RA                     | FYN                               |
| IL4                              | IL21R                     | EGFR                       | GRAP2                             |
| IL4RA                            | IL2RA                     | GRB2                       | GRB2                              |
| IL5                              | IL2RB                     | IFNAR1                     | IL10                              |
| JAK2                             | IL4                       | IFNAR2                     | IL2                               |
| JAK3                             | IL4RA                     | IFNK                       | IL4                               |
| JUN                              | IL6RA                     | IL10                       | IL5                               |
| LAT                              | IL6ST                     | IL10RB                     | JUN                               |
| LCK                              | IRF4                      | IL12A                      | KRAS                              |
| MAF                              | JAK2                      | IL13                       | LAT                               |
| MAML1                            | JAK3                      | IL15RA                     | LCK                               |
| MAML3                            | JUN                       | IL17D                      | LCP2                              |
| NFATC1                           | LAT                       | IL2                        | MALT1                             |
| NFATC2                           | LCK                       | IL20                       | MAP3K7                            |
| NFATC3                           | NFATC1                    | IL20RB                     | MAP3K8                            |
| NFKB1                            | NFATC2                    | IL21R                      | NCK2                              |
| NFKBIA                           | NFATC3                    | IL24                       | NFATC1                            |
| NOTCH1                           | NFKB1                     | IL2RA                      | NFATC2                            |
| NOTCH2                           | NFKBIA                    | IL2RB                      | NFATC3                            |
| PLCG1                            | PLCG1                     | IL3RA                      | NFKB1                             |
| PPP3CC                           | PPP3CC                    | IL4                        | NFKBIA                            |
| PRKCQ                            | PRKCQ                     | IL4RA                      | PIK3CD                            |
| RBPJ                             | RORA                      | IL5                        | PLCG1                             |
| RBPJL                            | RUNX1                     | IL6RA                      | PPP3CC                            |
| RUNX3                            | SMAD3                     | IL6ST                      | PRKCQ                             |
| STAT1                            | STAT1                     | IL7                        | PTPRC                             |
| STAT4                            | STAT3                     | IL7R                       | RAF1                              |
| STAT5B                           | STAT5B                    | JAK2                       | RASGRP1                           |
| TBX21                            | TBX21                     | JAK3                       | TEC                               |
| TYK2                             | TGFB1                     | LIF                        | TNF                               |
| ZAP70                            | TGFBR1                    | MCL1                       | VAV1                              |
|                                  | TGFBR2                    | MYC                        | ZAP70                             |
|                                  | TYK2                      | OSMR                       |                                   |
|                                  | ZAP70                     | PDGFB                      |                                   |
|                                  |                           | PIAS2                      |                                   |
|                                  |                           | PIAS4                      |                                   |
|                                  |                           | PIK3CD                     |                                   |
|                                  |                           | PIM1                       |                                   |
|                                  |                           | PRLR                       |                                   |
|                                  |                           | PTPN2                      |                                   |
|                                  |                           | RAF1                       |                                   |
|                                  |                           | SOCS1                      |                                   |
|                                  |                           | SOCS6                      |                                   |
|                                  |                           | STAM2                      |                                   |
|                                  |                           | STAT1                      |                                   |
|                                  |                           | STAT2                      |                                   |
|                                  |                           | STAT3                      |                                   |
|                                  |                           | STAT4                      |                                   |
|                                  |                           | STAT5B                     |                                   |
|                                  |                           | TYK2                       |                                   |

Table S6. List of genes associated with ADNP-CHD4-BRG1 peaks and with reduced H3K27ac in ADNP-deficient Th2 cells, related to Figure 7.

|                |                 |                       |                       |
|----------------|-----------------|-----------------------|-----------------------|
| <i>Il13</i>    | <i>Pstpip1</i>  | <i>Mxi1</i>           | <i>Cysltr2</i>        |
| <i>Il4ra</i>   | <i>Cyp4f39</i>  | <i>Dusp6</i>          | <i>Saysd1</i>         |
| <i>Maf</i>     | <i>Inpp5a</i>   | <i>Rab27a</i>         | <i>Bcl2l14</i>        |
| <i>Pdgfb</i>   | <i>Psap</i>     | <i>Nfyb</i>           | <i>Stim1</i>          |
| <i>Tmem40</i>  | <i>Usp37</i>    | <i>Fosl2</i>          | <i>Rbpj</i>           |
| <i>Pth</i>     | <i>Tmsb10</i>   | <i>Ak2</i>            | <i>Ankrd50</i>        |
| <i>Gm42602</i> | <i>Stat5b</i>   | <i>Cpd</i>            | <i>Gm47824</i>        |
| <i>Slc44a2</i> | <i>Fgf7</i>     | <i>Ammecr1l</i>       | <i>Dcp1b</i>          |
| <i>B3galt2</i> | <i>Dusp11</i>   | <i>Tsen2</i>          | <i>Gm37176</i>        |
| <i>Gse1</i>    | <i>Tacc1</i>    | <i>Ccdc71l</i>        | <i>Alpk2</i>          |
| <i>Birc3</i>   | <i>Acot11</i>   | <i>Jak2</i>           | <i>S1pr1</i>          |
| <i>Egln3</i>   | <i>Gm35808</i>  | <i>Atg10</i>          | <i>Rtkn2</i>          |
| <i>Id2</i>     | <i>Gm49337</i>  | <i>Mbnl1</i>          | <i>Srgap3</i>         |
| <i>Srf</i>     | <i>Rbm47</i>    | <i>Cyp11a1</i>        | <i>Cbr4</i>           |
| <i>Igfbp4</i>  | <i>Ptgn1</i>    | <i>Gm43822</i>        | <i>Cd83</i>           |
| <i>Adora2b</i> | <i>Sft2d2</i>   | <i>Znrf2</i>          | <i>Gm9887</i>         |
| <i>Vmp1</i>    | <i>Em1</i>      | <i>Arhgap12</i>       | <i>Rapgef5</i>        |
| <i>Slco3a1</i> | <i>Heg1</i>     | <i>Gm44068</i>        | <i>Mrp39</i>          |
| <i>Rnf19b</i>  | <i>B4galt5</i>  | <i>Samhd1</i>         | <i>Pde4b</i>          |
| <i>Inhba</i>   | <i>Mapk6</i>    | <i>Efna5</i>          | <i>49304120.13Rik</i> |
| <i>Nxpe3</i>   | <i>Irf2bp2</i>  | <i>Kcnk5</i>          | <i>Zfp36l2</i>        |
| <i>Ccl17</i>   | <i>Pparg</i>    | <i>Ccr4</i>           | <i>4931412l15Rik</i>  |
| <i>Sesn2</i>   | <i>Ddit4</i>    | <i>Acs4</i>           | <i>Gm44627</i>        |
| <i>Dysf</i>    | <i>Hsf2bp</i>   | <i>Ddr1</i>           | <i>Tex13c2</i>        |
| <i>Map2k6</i>  | <i>Nfil3</i>    | <i>Ttc30a1</i>        | <i>Dnajc1</i>         |
| <i>Nlrj1</i>   | <i>Gpx3</i>     | <i>E130114P.18Rik</i> | <i>Cpm</i>            |
| <i>Slc35a5</i> | <i>Rnf19a</i>   | <i>Gm44861</i>        | <i>Gtdc1</i>          |
| <i>Manbal</i>  | <i>Muc13</i>    | <i>Ndfip1</i>         | <i>Ebf1</i>           |
| <i>Nab2</i>    | <i>Gm43963</i>  | <i>Ankrd46</i>        | <i>Gm47089</i>        |
| <i>Gm37352</i> | <i>Ripor2</i>   | <i>Gm38341</i>        | <i>Gc</i>             |
| <i>Dcakd</i>   | <i>Celsr1</i>   | <i>Rnf152</i>         | <i>Gm17359</i>        |
| <i>Arf2</i>    | <i>Ywhah</i>    | <i>Lpp</i>            | <i>Thada</i>          |
| <i>Il24</i>    | <i>Zbtb38</i>   | <i>Gcm1</i>           | <i>AL607142.1</i>     |
| <i>Gm42906</i> | <i>F2r1l</i>    | <i>Rpl11</i>          | <i>Kcnj15</i>         |
| <i>Rps6ka5</i> | <i>Gm44062</i>  | <i>Nsmce2</i>         | <i>Ube2cbp</i>        |
| <i>Cd200</i>   | <i>Tns4</i>     | <i>Col18a1</i>        | <i>Cstf2t</i>         |
| <i>Kif3b</i>   | <i>Stk33</i>    | <i>Gramd1b</i>        | <i>Cd47</i>           |
| <i>Gm37535</i> | <i>Vgl4</i>     | <i>Rassf6</i>         | <i>Samsn1</i>         |
| <i>Wfpy2</i>   | <i>Gcg</i>      | <i>Kbtbd11</i>        | <i>Gm49167</i>        |
| <i>Map3k3</i>  | <i>Lactb</i>    | <i>Lptm4a</i>         | <i>Rasgrp1</i>        |
| <i>Itga3</i>   | <i>Nckap5</i>   | <i>Utp23</i>          | <i>Tomm20</i>         |
| <i>Batf</i>    | <i>Adamts14</i> | <i>Ube2v1</i>         | <i>Zfp1</i>           |
| <i>Rab13</i>   | <i>Ier5</i>     | <i>Med13l</i>         | <i>Atg7</i>           |
| <i>Mdm2</i>    | <i>Sec61g</i>   | <i>Bcat1</i>          | <i>Jun</i>            |
| <i>Cmss1</i>   | <i>Gm44198</i>  | <i>Gm43636</i>        | <i>Chd7</i>           |
| <i>Anp32a</i>  | <i>Asb2</i>     | <i>Notch2</i>         | <i>Nup35</i>          |
| <i>Erc1</i>    | <i>Ksr1</i>     | <i>Gm43637</i>        | <i>Gja1</i>           |
| <i>Elk3</i>    | <i>Ncoa3</i>    | <i>Pde11a</i>         | <i>Jmjd1c</i>         |
| <i>Kat7</i>    | <i>Smndc1</i>   | <i>Vstm5</i>          | <i>3110018l06Rik</i>  |
| <i>Rcc1</i>    | <i>Jade2</i>    | <i>Fam49b</i>         | <i>Myc</i>            |
| <i>Uqcrfs1</i> | <i>Samd13</i>   | <i>Septin9</i>        | <i>Mllt3</i>          |
| <i>Pim3</i>    | <i>Cnst</i>     | <i>Gm37192</i>        | <i>Runx1</i>          |
| <i>Pecam1</i>  | <i>Ier3</i>     | <i>Auh</i>            | <i>Smyd3</i>          |
| <i>Tmem154</i> | <i>Stoml1</i>   | <i>Eif4e</i>          | <i>Rnf144a</i>        |
| <i>Sox5</i>    | <i>Rnf157</i>   | <i>Dnajc5b</i>        | <i>Rab3c</i>          |
| <i>Thy1</i>    | <i>Klhl25</i>   | <i>Coro6</i>          | <i>Gsdmc</i>          |
| <i>Sema4d</i>  | <i>Jard2</i>    | <i>Gm13691</i>        | <i>Gm48502</i>        |
